# Supplementary material for: Effect of Varying Zinc Concentrations on the Biomethane Potential of Sewage Sludge
Source: MDPI journal article supplement (doi:10.3390/w15040729), 2023-02-12
Supplement: s1 [file s1]

Archive with 1 entries (1 files):
- water-2147528-supplementary.pdf
