# Supplementary material for: Effect of Varying Zinc Concentrations on the Biomethane Potential of Sewage Sludge
Source: MDPI journal article supplement (doi:10.3390/w15040729), 2023-02-12
Supplement: s1 [file s1 › water-2147528-supplementary.pdf]

## Supplementary Information

### Effect of varying zinc concentrations on the biomethane potential of sewage sludge

Manoj Kumar<sup>1\*</sup>, Silvio Matassa<sup>1</sup>, Francesco Bianco<sup>2</sup>, Armando Oliva<sup>1</sup>, Stefano Papirio<sup>1</sup>, Francesco Pirozzi<sup>1</sup>, Francesco De Paola<sup>1</sup>, Giovanni Esposito<sup>1</sup>

<sup>1</sup>Department of Civil, Architectural and Environmental Engineering, University of Napoli Federico II, via Claudio 21, 80125 Napoli (Italy)

<sup>2</sup>Department of Civil and Mechanical Engineering, University of Cassino and Southern Lazio, via Di Biasio 43, 03043 Cassino (Italy)

\*Correspondence: manoj.kumar@unina.it

**Figure**

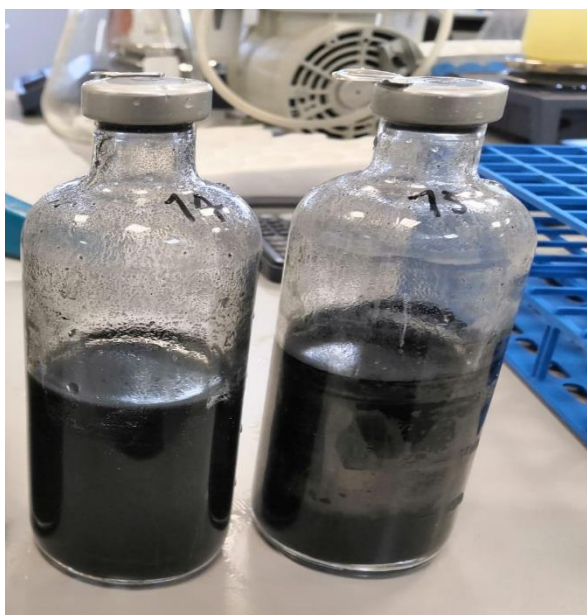

**Figure S1.** Serum bottles with dark black color likely indicating a high formation of zinc sulfide.
